# Resistance Mutation R292K Is Induced in Influenza A(H6N2) Virus by Exposure of Infected Mallards to Low Levels of Oseltamivir

Anna Gillman<sup>1</sup>, Shaman Muradrasoli<sup>2</sup>, Hanna Söderström<sup>3</sup>, Johan Nordh<sup>1</sup>, Caroline Bröjer<sup>4</sup>, Richard H. Lindberg<sup>3</sup>, Neus Latorre-Margalef<sup>5</sup>, Jonas Waldenström<sup>5</sup>, Björn Olsen<sup>1</sup>, Josef D. Järhult<sup>1\*</sup>

**1** Section of Infectious Diseases, Department of Medical Sciences, Uppsala University, Uppsala, Sweden, **2** Section of Bacteriology and Food Safety, Department of Biomedical Sciences and Veterinary Public Health, Swedish University of Agricultural Sciences, Uppsala, Sweden, **3** Department of Chemistry, Umeå University, Umeå, Sweden, **4** Section of Pathology, Pharmacology and Toxicology, Department of Biomedical Sciences and Veterinary Public Health, Swedish University of Agricultural Sciences, Uppsala, Sweden, **5** Section for Zoonotic Ecology and Epidemiology, School of Natural Sciences, Linnaeus University, Kalmar, Sweden

## Abstract

Resistance to neuraminidase inhibitors (NAIs) is problematic as these drugs constitute the major treatment option for severe influenza. Extensive use of the NAI oseltamivir (Tamiflu®) results in up to 865 ng/L of its active metabolite oseltamivir carboxylate (OC) in river water. There one of the natural reservoirs of influenza A, dabbling ducks, can be exposed. We previously demonstrated that an influenza A(H1N1) virus in mallards (*Anas platyrhynchos*) exposed to 1 µg/L of OC developed oseltamivir resistance through the mutation H274Y (N2-numbering). In this study, we assessed the resistance development in an A(H6N2) virus, which belongs to the phylogenetic N2 group of neuraminidases with distinct functional and resistance characteristics. Mallards were infected with A(H6N2) while exposed to 120 ng/L, 1.2 µg/L or 12 µg/L of OC in their sole water source. After 4 days with 12 µg/L of OC exposure, the resistance mutation R292K emerged and then persisted. Drug sensitivity was decreased ≈13,000-fold for OC and ≈7.8-fold for zanamivir. Viral shedding was similar when comparing R292K and wild-type virus indicating sustained replication and transmission. Reduced neuraminidase activity and decrease in recovered virus after propagation in embryonated hen eggs was observed in R292K viruses. The initial, but not the later R292K isolates reverted to wild-type during egg-propagation, suggesting a stabilization of the mutation, possibly through additional mutations in the neuraminidase (D113N or D141N) or hemagglutinin (E216K). Our results indicate a risk for OC resistance development also in a N2 group influenza virus and that exposure to one NAI can result in a decreased sensitivity to other NAIs as well. If established in influenza viruses circulating among wild birds, the resistance could spread to humans via re-assortment or direct transmission. This could potentially cause an oseltamivir-resistant pandemic; a serious health concern as preparedness plans rely heavily on oseltamivir before vaccines can be mass-produced.

**Citation:** Gillman A, Muradrasoli S, Söderström H, Nordh J, Bröjer C, et al. (2013) Resistance Mutation R292K Is Induced in Influenza A(H6N2) Virus by Exposure of Infected Mallards to Low Levels of Oseltamivir. PLoS ONE 8(8): e71230. doi:10.1371/journal.pone.0071230

**Editor:** Yue Wang, National Institute for Viral Disease Control and Prevention, CDC, China, China

**Received:** November 22, 2012; **Accepted:** June 29, 2013; **Published:** August 12, 2013

**Copyright:** © 2013 Gillman et al. This is an open-access article distributed under the terms of the Creative Commons Attribution License, which permits unrestricted use, distribution, and reproduction in any medium, provided the original author and source are credited.

**Funding:** The Family Olander-Nielsen's Foundation, the Swedish Research Council and the Swedish Research Council (FORMAS) provided financial support. F. Hoffman-La Roche Ltd. donated OC and deuterium labeled OC. The funders had no role in study design, data collection and analysis, decision to publish, or preparation of the manuscript.

**Competing Interests:** F. Hoffman – La Roche Ltd. donated OC and deuterium labeled OC used in this study. This does not alter our adherence to all the PLOS ONE policies on sharing data and materials.

\* E-mail: josef.jarhult@medsci.uu.se

## Introduction

Resistance to the antiviral drugs neuraminidase inhibitors (NAIs) is a problem as they are the best available option for treatment and prophylaxis of influenza A virus infection. The NAI oseltamivir (Tamiflu®) has been stockpiled in large quantities in many nations as part of preparedness plans for a new influenza pandemic [1,2]. The use of oseltamivir is especially important in the first phase of a pandemic, before vaccines can be mass-produced. Thus, a new pandemic strain resistant to oseltamivir would be of substantial individual and public health concern. The emergence and spread of the resistant seasonal (pre-pandemic) A(H1N1) strain 2007–2009 tilted the previous concept of decreased fitness of resistant viruses [3]. If a resistance mutation occurs in a permissive genetic background the decreased fitness

can be compensated for [4,5]. In wetland birds, the natural reservoir for influenza A virus, the genetic variability of influenza A virus is tremendous; 16 haemagglutinin (HA) and 9 neuraminidase (NA) surface proteins exist in varying combinations [6,7]. All studied pandemics (from the last century) have contained gene segments from avian influenza A virus lineages [7–10] and thus there is good reason to believe that this will be the case also in future pandemics.

Oseltamivir administered orally (as the pro-drug oseltamivir phosphate) is readily absorbed and converted to the active metabolite oseltamivir carboxylate (OC). At least 75% of a given dose reaches the blood circulation as OC and is then excreted unchanged via the urine. OC is stable in sewage treatment processes and has been detected in effluents from sewage treatment plants (up to 1.21 µg/L) and in river water (up to

865 ng/L) [11–15]. Sampling in Germany suggests discharge from pharmaceutical industries as another contributing source [16].

There are two phylogenetic groups of neuraminidases (NAs), N1 (including N1, N4, N5, N8) and N2 (including N2, N3, N6, N7, N9). Resistance mutations and the exact binding site of OC adjacent to the active site differ between the two groups. The most common resistance mutations are H274Y (N2 numbering, this numbering is used throughout the paper) in the N1, and R292K or E119V in the N2 group [17–20].

There is an interdependence of HA and NA activity for optimal viral replication and NAIs can induce mutations in HA as well as in NA residues [21]. Once a NAI resistance mutation has occurred, compensation of decreased NA function by new compensatory mutations have been described in both HA and NA. In N1 virus compensatory mutations in NA [4,22] and concomitant mutations at the receptor binding site in HA[23–25] related to H274Y have been described. In N2 virus with the R292K mutation no compensatory mutations in NA have been defined, however secondary balancing mutations in the HA are described; in a patient (R228S) [26] and in vitro (N199S and G143E) [27].

We previously found that a low-pathogenic avian influenza A(H1N1) virus developed resistance to oseltamivir when infected mallards were exposed to low, environmental-like levels of OC (1 µg/L) [28]. It is likely that resistance can be induced in all influenza A viruses with the N1 group of NAs under these circumstances. However, given the distinct characteristics of the N2 group of NAs, it is unclear if resistance can be induced also on this phylogenetic group of influenza A viruses under conditions approximating an environmental situation. To test this, we used the same mallard model and an influenza A(H6N2) virus isolated from a wild mallard in Sweden. In brief, we inoculated two mallards with the virus and then successively introduced new generations of birds in three subsequent experiments with increasing concentrations of OC (120 ng/L, 1.2 µg/L or 12 µg/L) in the ducks' sole water source. We then analyzed virus from fecal samples with regard to resistance mutations and sensitivity to NAIs (Figure 1, details in *Materials and Methods*).

## Results

### Infection of Mallards

No mallards were infected with influenza A virus prior to entering the animal house facilities, verified by serology and real time reverse transcriptase (RRT-) PCR. The exposure to OC started at the time of inoculation and lasted all through the experiment. From the birds exposed to 120 ng/L and 1.2 µg/L of OC viral shedding occurred from day one post infection (pi) through day five, with a maximum at day 2–4 pi and a slight decrease the last day of each generation (Figure 2). No difference in shedding was seen when comparing the birds infected by esophageal inoculation to those infected by transmission from other birds (data not shown), consistent with our previous study [29]. Wild-type virus was present in the two first generations of the 12 µg/L experiment; in those generations no virus was shed day 1 pi and viral shedding seemed to be lower at day 3–4 pi compared to the 120 ng/L and 1.2 µg/L experiments. The two later generations of the 12 µg/L experiment, in which the virus was R292K mutated, had similar shedding patterns as those seen at OC levels of 120 ng/L and 1.2 µg/L (Figure 2).

Throughout all experiments, influenza A virus was detected in the water by RRT-PCR. CT-values ranged from 22 to 32 and were similar in all three experiments with exception of day 1 pi for

the 1.2 µg/L and the 12 µg/L experiments where CT values of 36.5 were found, indicating lower viral titers.

### Analysis of Viral Mutations in the Neuraminidase (NA) and Hemagglutinin (HA)

No mutations related to resistance were seen when sequencing NA in fecal samples from ducks exposed to OC levels of 120 ng/L or 1.2 µg/L. At 12 µg/L of OC, the resistance mutation R292K (the arginine codon AGA changed to the lysine codon AAA) in the NA occurred in the first generation of mallards 4 days pi as a mixed genotype, and dominated from day 5 pi and throughout the experiment. Sequencing of NA from water samples revealed the R292K mutation from day 5 pi and onwards.

In addition to the R292K mutation, the D113N and D141N mutations evolved (the aspartic acid codon GAC changed to the asparagine codon AAC) in the 12 µg/L experiment from day 7 and 8 pi respectively. NA sequencing of the fecal samples showed either D113N or D141N, or mixed sequencing results of both mutations, but both mutations did not dominate at the same time. The D113N mutation was found in water samples from day 8 pi and D141N from day 12 pi, whereafter both mutations were present as mixed genotypes. Taken together, these results suggest that either of the mutations D113N or D141N was present in a single virus, but not both mutations at the same time.

Sequencing of HA of 6 isolates from the 12 µg/L experiment revealed the E216K mutation (H3-numbering, the GAA codon for glutamic acid changed to AAA for lysine) in the same isolates that also harbored R292K in combination with D113N or D141N in the NA (but not in wild type isolates or isolates with only R292K), i.e. E216K was present in the latest samples from the experiment.

### Propagation in Embryonated Hen Eggs

Prior to phenotypic analysis of resistance the viral samples were propagated in specific pathogen free embryonated hen eggs. In total, virus from 38 fecal samples was processed for egg propagation. Of those, 13 of 23 isolates (56%) originally carrying R292K were successfully propagated and 13 of 15 isolates (87%) with wild-type R292. When re-sequencing the isolates after the propagation process we found wild-type R292 in 3 of the 13 R292K isolates, all from the first generation of birds of the 12 µg/L experiment, and in one isolate from the second generation birds we found mixed genotype after the propagation. The 9 following R292K isolates from generation 2, 3 and 4 retained the mutation through the propagation process. All 9 isolates additionally had the D113N or D141N mutations that also were retained through the egg propagation (Figure 3). The E216K mutation in HA also persisted through the egg propagation process.

### Neuraminidase Activity and Inhibition by Oseltamivir and Zanamivir

Inhibition of NA activity with OC and zanamivir (ZA) was compared between isolates with the R292K-mutation (10 evaluable isolates) and wild-type isolates (5 from 120 ng/L, 4 from 1.2 µg/L and 5 from 12 µg/L OC-levels). The mean 50% inhibitory concentration (IC<sub>50</sub>) for OC was 2,900 nM (95% CI of median 2,600, 3,000) of the R292K isolates, significantly different at a 95% level to 0.21 nM (95% CI of median 0.15, 0.21) of the wild type isolates ( $P=0.000082$ ), corresponding to a 13,000 fold reduced sensitivity (highly reduced according to WHO criteria [30]). Mean IC<sub>50</sub> for ZA was 5.3 nM (95% CI of median 4.5, 6.8) of R292K isolates and 0.68 (95% CI of median 0.44, 0.92) nM of wild type isolates, as well significantly different at a 95% level ( $P=0.000082$ ), corresponding to a 7.6 fold reduced sensitivity

|        |                                                                                   |                                                                                   |                                                                                   |                                                                                     |
|--------|-----------------------------------------------------------------------------------|-----------------------------------------------------------------------------------|-----------------------------------------------------------------------------------|-------------------------------------------------------------------------------------|
| Day 0  |  |                                                                                   |                                                                                   |                                                                                     |
| Day 1  | Day 1 pi                                                                          |                                                                                   |                                                                                   |                                                                                     |
| Day 2  | Day 2 pi                                                                          |                                                                                   |                                                                                   |                                                                                     |
| Day 3  | Day 3 pi                                                                          |  |                                                                                   |                                                                                     |
| Day 4  | Day 4 pi                                                                          | Day 1 pi                                                                          |                                                                                   |                                                                                     |
| Day 5  | Day 5 pi                                                                          | Day 2 pi                                                                          |                                                                                   |                                                                                     |
| Day 6  |                                                                                   | Day 3 pi                                                                          |  |                                                                                     |
| Day 7  |                                                                                   | Day 4 pi                                                                          | Day 1 pi                                                                          |                                                                                     |
| Day 8  |                                                                                   | Day 5 pi                                                                          | Day 2 pi                                                                          |                                                                                     |
| Day 9  |                                                                                   |                                                                                   | Day 3 pi                                                                          |  |
| Day 10 |                                                                                   |                                                                                   | Day 4 pi                                                                          | Day 1 pi                                                                            |
| Day 11 |                                                                                   |                                                                                   | Day 5 pi                                                                          | Day 2 pi                                                                            |
| Day 12 |                                                                                   |                                                                                   |                                                                                   | Day 3 pi                                                                            |
| Day 13 |                                                                                   |                                                                                   |                                                                                   | Day 4 pi                                                                            |
| Day 14 |                                                                                   |                                                                                   |                                                                                   | Day 5 pi                                                                            |

**Figure 1. Set-up of the Mallard Model.** Each experiment consisted of 4 generations of mallards with 2 individuals in each. The first generation of mallards was infected by esophageal inoculation with the *A/Mallard/Sweden/50908/2006(H6N2)* virus (day 0) and were put in the experimental room where the sole water source contained OC. The following generations were introduced with 3-day intervals allowing the infection to be fecal-orally transmitted between generations during two days. Five days after introduction, each generation birds were removed and euthanized. The water in the sole water source of the birds was changed daily and contained the same level of OC during each 14 day-experiment. Three subsequent experiments were performed with OC levels of 120 ng/L, 1.2 µg/L and 12 µg/L. doi:10.1371/journal.pone.0071230.g001

(normal according to WHO criteria [30]). The IC<sub>50</sub> values for wild type genotype in the experiments were similar to the inoculate strain *A/Mallard/Sweden/50908/2006(H6N2)* which had an IC<sub>50</sub> of 0.26 nM for OC (95% CI of median 0.093, 0.60) and 0.55 nM for ZA (95% CI of median 0.41, 0.69) in 8 repeated assays (Table 1).

One R292K-isolate from day 9 pi had an IC<sub>50</sub> of 770 nM for OC and 0.32 nM for ZA. We did not find a good explanation for this outlier; no additional mutations in the NA could be detected. This isolate has been excluded from the data presentation but the

general conclusions of the study would not be affected if it had been included.

While assaying the NA activity by the relative fluorescence measurement prior to dilution of samples for the inhibition assay, we noted an approximately 70% reduction of NA activity of the R292K isolates compared to wild type with mean RFU 8,000 of the mutant (95% CI of median 3,900, 9,000), significantly different at a 95% level to 27,000 of wild type virus (95% CI of median 24,000, 32,000) (P<0.000001). No further enzymological evaluations of the NA characteristics were performed.

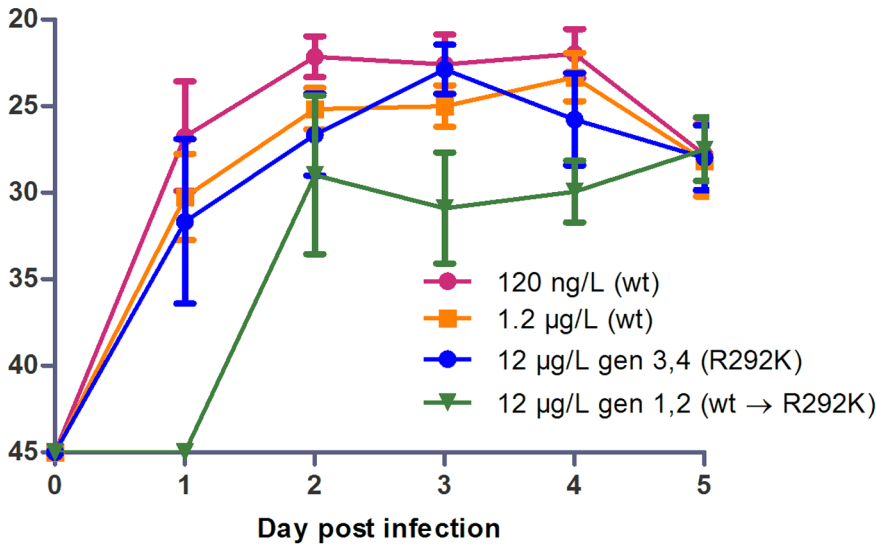

**Figure 2. Viral Shedding.** RRT-PCR performed on fecal samples. The Y-axis displays CT-values. The cut-off for negative results was set to a CT-value of 45. Error bars display  $\pm$  standard deviation. n=8 in 120 ng/L and 1.2 µg/L groups, n=4 in the two groups from the 12 µg/L experiment. doi:10.1371/journal.pone.0071230.g002

| Sequencing of fecal samples |       |           |       |           |           |            |            |            |        | Sequencing after propagation in eggs |    |    |         |         |         |            |         |
|-----------------------------|-------|-----------|-------|-----------|-----------|------------|------------|------------|--------|--------------------------------------|----|----|---------|---------|---------|------------|---------|
| G1                          | G1    | G2        | G2    | G3        | G3        | G4         | G4         | H2O        | Day pi | G1                                   | G1 | G2 | G2      | G3      | G3      | G4         | G4      |
|                             |       |           |       |           |           |            |            |            | 0      |                                      |    |    |         |         |         |            |         |
| ns                          | ns    |           |       |           |           |            |            | wt         | 1      | ne                                   | ne |    |         |         |         |            |         |
| wt                          | wt    |           |       |           |           |            |            | wt         | 2      | wt                                   | ne |    |         |         |         |            |         |
| wt                          | fs    |           |       |           |           |            |            | wt         | 3      | wt                                   | ne |    |         |         |         |            |         |
| (R292K)                     | fs    | ns        | ns    |           |           |            |            | wt         | 4      | wt                                   | fe | ne | ne      |         |         |            |         |
| R292K                       | R292K | R292K     | wt    |           |           |            |            | R292K      | 5      | wt                                   | wt | ne | ne      |         |         |            |         |
|                             |       | R292K     | fs    |           |           |            |            | (R292K)    | 6      |                                      |    | ne | ne      |         |         |            |         |
|                             |       | R292K     | wt    | R292K (+) | ns        |            |            | R292K      | 7      |                                      |    | ne | ne      | R292K   | ne      |            |         |
|                             |       | R292K (*) | R292K | R292K (+) | R292K (*) |            |            | R292K (*)  | 8      |                                      |    | ne | (R292K) | fe      | fe      |            |         |
|                             |       |           |       | R292K +   | R292K *   |            |            | R292K *    | 9      |                                      |    |    |         | R292K * | R292K + |            |         |
|                             |       |           |       | R292K +   | R292K *   | fs         | ns         | R292K *    | 10     |                                      |    |    |         | R292K * | fe      | R292K *    | fe      |
|                             |       |           |       | R292K +   | R292K *   | R292K (+*) | R292K (+*) | R292K *    | 11     |                                      |    |    |         | fe      | fe      | R292K (+*) | fe      |
|                             |       |           |       |           |           | fs         | R292K +    | R292K (+*) | 12     |                                      |    |    |         |         |         | R292K *    | R292K + |
|                             |       |           |       |           |           | R292K (+*) | R292K +    | R292K (+*) | 13     |                                      |    |    |         |         |         | R292K *    | fe      |
|                             |       |           |       |           |           | R292K (+*) | R292K +    | R292K (+*) | 14     |                                      |    |    |         |         |         | fe         | fe      |

**Figure 3. Mutation Analysis of NA the 12 µg/L Experiment.** Sequencing of the NA gene from fecal samples, water and post egg propagation from the 12 µg/L experiment. G=generation. Pi=post infection. H2O=water. Green wt=wild type. Red R292K=mutated at 292. Red (R292K)=mixed genotype R292 and K292. \*=D113N. (\*)=mixed genotype D113 and N113.+ =D141N. (+)=mixed genotype D141 and N141. Purple fs=failure to sequence. Blue fe=failure to propagate in embryonated hen eggs. White ns=not sequenced. White ne=not propagated in embryonated hen eggs. doi:10.1371/journal.pone.0071230.g003

**Table 1.** Viral Sensitivity to Oseltamivir and Zanamivir by IC<sub>50</sub>.

| Virus         | IC <sub>50</sub> OC            | IC <sub>50</sub> ZA            |
|---------------|--------------------------------|--------------------------------|
|               | nM (95% CI <sub>median</sub> ) | nM (95% CI <sub>median</sub> ) |
| 50908 wt      | 0.26*                          | 0.55*                          |
| R292 (n = 14) | 0.21 (0.15, 0.21)              | 0.68 (0.44, 0.92)              |
| R292K (n = 9) | 2,900 (2,600, 3,000)           | 5.3 (4.5, 6.8)                 |

\*– The IC<sub>50</sub>s of the original wild-type A/Mallard/Sweden/50908/2006(H6N2) virus (50908 wt) are means based on 8 repeated assays.  
doi:10.1371/journal.pone.0071230.t001

**Histopathologic Evaluation**

Two birds from each experiment (one artificially inoculated and one infected by transmission from another bird) were necropsied at 5 days pi and examined with histopathology and immunohistochemistry (IHC) staining of influenza A nucleoprotein. One of six examined birds was infected with the R292K-mutated virus and the rest with wild-type virus. The R292K-mutant infected bird (fecal-orally infected) and one wild-type infected bird (artificially inoculated, from the 1.2 µg/L experiment) had one section each of the intestine where weak IHC positivity was demonstrated in distal epithelial cells and monocytes. The remaining four birds were negative with regard to IHC staining. The histopathologic evaluation showed that several sections of intestine had mild to moderate amounts of heterophils in the lamina propria but there was no correlation between presence of heterophils and IHC-positivity.

**OC Concentration in the Water**

The average daily OC concentrations (each measured after 24 h of exposure when the water was changed) were 121 ± 19 ng/L, 1,238 ± 266 ng/L and 12,095 ± 3,095 ng/L (± standard deviation) in the respective experiments. In comparison, the differences in average (n = 3) daily OC concentration between freshly prepared water and in the water after 24 h experiment was maximum ± 30%. These concentration differences are within the general variation of chemical analysis of pharmaceuticals and can be caused by differences in procedures of the OC-water preparation, water sampling, pre-treatment of samples, and sample analysis. The limit of quantification (LOQ) of OC was 1 ng/L, the linearity (R<sup>2</sup>) of the calibration curve was 1.0000 and the relative standard deviation (RSD) between pseudo-triplicates (triplicates taken from one collected sample) was in the range 4 to 26%.

**Mutation Screening of NCBI Influenza Virus Sequence Database**

Amino acid sequences of the NA protein from 2514 avian influenza A/N2 viruses were downloaded from the NCBI Influenza Virus Sequence Database [31] and analyzed. No sequences contained R292K. Only two isolates had other amino acids at position 292; one had R292W (a H9N2 virus isolated from a sparrow in China 2006, ADC97091) and one had a 14 amino acid sequence exchange including position 292 (a H9N2 virus isolated from a duck in China 2001, ABG27052). D113N and D141N were frequent variants, D113N in approximately 1–10% and D141N in approximately 20–40% (varying proportions with different HA subtype combination) although the mutations did not occur simultaneously.

**Discussion**

In this study, we demonstrate resistance development in an influenza A(H6N2) virus in mallards exposed to 12 µg/L of OC in their sole water source. The resistance was caused by acquisition of the mutation R292K in the NA. The drug sensitivity was ≈13,000-fold decreased for OC and ≈7.6-fold decreased for ZA which is in parity with previous findings [19,32] (Table 1).

The occurrence and relevance of the R292K mutation has been described already during the development phase of oseltamivir both *in vitro* [33,34] and in humans treated with the substance during clinical trials [35,36]. Clinically the mutation has occurred in oseltamivir-treated patients leading to prolonged viral carriage [26,37].

The difference in sensitivity decrease to OC and ZA caused by R292K can be explained by the protein structure of N2 NAs. R292 is located at the catalytic site and OC affinity requires binding of the hydrophobic pentyl ether side chain deep in the catalytic site, this is not required for the binding of ZA. In wild-type N2-OC complex formation, the E276 residue moves and becomes salt linked to R224; this opens up a hydrophobic pocket where the OC pentyl ether group binds. The exchange of arginin to lysin at position 292 results in tighter binding with E276, which inhibits the movement and the creation of the hydrophobic pocket, whereby the affinity for OC is reduced. ZA binding does not require a conformational change in the active site and the slight decrease in binding to the R292K mutant is due to a lower ability to penetrate the active site [27,38].

The R292K mutation has previously been shown to decrease NA activity [19,27,32] and to decrease replication capacity in cell cultures and in embryonated hen eggs, although conflicting results have been found in replication studies [33–35,39]. Studies in mammal models have previously shown reduced infectivity in mice and ferrets [34–36] and no or reduced transmissibility in ferrets [36,39] of R292K-mutated virus. We evaluated viral replication in the mallard intestine and transmissibility between individuals by measuring viral shedding in fecal samples using RRT-PCR. No difference in shedding pattern was observed when comparing wild-type virus from the 120 ng/L and 1.2 µg/L OC levels and R292K-mutated virus from the 12 µg/L OC level suggesting a retained replicative capacity for the mutant. The unchanged viral shedding pattern of the two last generations of mallards in the 12 µg/L experiment (shedding R292K mutated virus) furthermore indicates that the transmissibility was not reduced for the mutant virus (Figure 2). The set-up of our model with close contact between birds in a confined space while shedding a maximum of virus may however not be optimal to detect a slight decrease in transmissibility. The two first generations mallards from the 12 µg/L OC level, during which the mutation developed, had lower viral excretions, especially the first days. It is probable that this was due to OC-inhibition of the replication of wild-type virus.

Although no proper kinetic assay of the NA enzyme was performed, we observed an approximately 70% reduction in NA-activity of the R292K isolates while preparing our viral samples for NAI inhibition analysis. These observations are in parity to what has previously been reported [19,27,32].

One of the birds from which sections of intestine were evaluated by IHC, was infected with R292K-mutated virus. The IHC stain was weakly positive in one section which is similar to what was seen in birds infected with wild-type virus, and to previous results from mallards infected with A(H1N1) wild-type virus in the same model [29]. This suggests similar infectivity of the R292K mutant compared to wild-type virus in the mallard gut. As the data

regarding the mutated virus is from one bird only it must be interpreted with some caution. It does however demonstrate that fecal-oral infection with a R292K-mutated virus resulted in IHC positivity in the intestine 5 days pi which was not seen in any of the two birds fecal-orally infected with wild-type A(H6N2) virus. In our previous study, mallards infected with wild-type A(H1N1) virus showed IHC positivity in 29% of the birds [29].

We observed a decrease in recoverable virus after propagation in embryonated hen eggs when comparing R292K to wild-type, suggesting a decreased replication capacity in embryonated hen eggs. Among the mutants, the first 3 isolates had wild-type R292 and the fourth a mixed genotype when re-sequenced after the propagation process, while all later mutants retained the mutation. This might be caused by a higher proportion of wild-type virus being present in earlier samples despite the fact that the Sanger sequencing showed only AAA for lysine at the 292 position, as this method has a limited sensitivity, or it might reflect a stabilization of the mutation later in the experiment.

Our findings of additional mutations D113N or D141N in the NA and E216K in the HA together with R292K in the last isolates of the high-dose experiment, co-varied with the persistence of R292K through the egg propagation process. It is possible that the additional NA mutations altered the NA characteristics. Both D113N and D141N are frequently occurring variants in avian N2 strains and the residues are closely located to each other. The residues are not situated immediately adjacent to the active site, but further structural analysis and functional evaluation of the mutations has not yet been performed. The E216K substitution in HA has not been reported in relation to NAI-resistance mutations in the NA. The residue is however close to the 220 loop of the HA binding site [21] and residues essential for binding specificity [40,41] and might possibly compensate for the R292K NA mutation. These findings need to be further examined.

Persistence of R292K without drug pressure has been shown in vitro [27] but not in vivo in a ferret model [42] or in a treated patient [26]. When the NCBI database was screened, no R292K-carrying avian influenza A/N2 virus was found. This could indicate instability of the mutation without drug pressure or reflect that OC drug pressure has not yet made a significant imprint among circulating avian N2 viruses.

Several studies have detected OC in the aquatic environment [12–15], and generally environmental levels in the magnitude of lower to mid ng/L have been found. Up to 865 ng/L of OC has been detected in river water which is 14-fold lower than the 12 µg/L of OC where we observed resistance development. We do however argue that there are reasons to take our results into environmental account as the threshold for resistance development could lie anywhere between 1.2 and 12 µg/L and as seen in our previous experiment with an A(H1N1) virus the resistance mutation (H274Y) was detected at 1 µg/L in only two samples [28]; a similar resistance development could have been missed in the present, shorter experiment. Furthermore, avian influenza A viruses have a large genetic variability, and their sensitivity to NAIs vary to a larger extent than the sensitivity of mammalian viruses [43]; thus there is probably a variety of resistance thresholds in influenza viruses circulating among wild birds and viruses with lower thresholds than our randomly chosen H6N2 virus may well exist. Finally, although the general magnitude of environmental OC levels has been established, there is still a possibility that higher OC levels could occur, e.g. in a severe pandemic or locally when oseltamivir prophylaxis is extensively used to blanket an outbreak.

Like previously studied influenza pandemics, also future ones can be expected to contain genetic material from avian strains e.g.

through re-assortment [8,9]. Human adaptation of highly-pathogenic avian influenza is another dramatic scenario highlighted by recent demonstrations of a low genetic barrier to airborne mammal-to-mammal transmission of highly-pathogenic avian H5N1 viruses [44–46]. The switch of HA binding preference from sialic acid-2,3 $\alpha$ -galactose to sialic acid-2,6 $\alpha$ -galactose involved in this adaptation does not per se generate resistance to NAIs [47]. Should however NAI resistance mutation(s) already be present in the NA of such a virus a pandemic situation would be difficult to handle as the primary treatment option using stockpiled oseltamivir [2] would fail. Especially during the first phase of a pandemic the lack of treatment options would be troublesome as mass-production of effective vaccines takes several months to accomplish [48,49]. During the 2009 pandemic, ZA was used alone or in combination with oseltamivir to treat particularly ill patients, e.g. in intensive care units [50,51]. Despite the low increase in IC<sub>50</sub> to ZA (<10-fold) by the R292K mutation, it still raises concern as it indicates that overuse of one NAI might harm also other members of this drug class.

In conclusion, we here demonstrate resistance development in an influenza A virus from the N2 group of NAs (H6N2) when one of its natural hosts was infected and exposed to 12 µg/L of OC in their water environment. Drug sensitivity was decreased  $\approx$ 13,000-fold for OC and  $\approx$ 7.6-fold for ZA. The mutated virus showed signs of decreased fitness regarding NA-activity and replicative capacity in embryonated hen eggs but infected mallards and transmitted among them as readily as the wild-type virus. Persistence of the mutation through the egg propagation in samples from the later part of the experiment, as well as normalization of viral shedding during the last part of the high concentration experiment might reflect an adaptation of the virus to harbor the mutation. It is possible that the additional mutations D113N or D141N in NA and/or E216K in HA might have influenced such an adaptation, like permissive mutations have been demonstrated in N1 virus that can compensate for the resistance mutation H274Y [4,5,22]. Further investigations are needed in this regard, as well as whether the R292K mutation can be retained in mallards also without drug pressure.

Overuse of oseltamivir can result in significant levels in the environment which could lead to resistance development in different avian influenza A viruses with pandemic potential. Thus, an improved sewage treatment and a prudent use of neuraminidase inhibitors are important priorities.

## Materials and Methods

### Virus and Drugs

The influenza A/*Mallard*/Sweden/50908/2006(H6N2) virus was isolated from a wild mallard (*Anas platyrhynchos*) during long-term influenza surveillance studies at Ottenby Bird Observatory in South-East Sweden [52]. The virus was isolated in specific pathogen-free embryonated hens' eggs according to standard WHO methods [53] by inoculation of the sample into the allantoic cavity of 11-day old embryonated eggs. The allantoic fluid was harvested after 2 days, and influenza A virus was detected by a hemagglutination inhibition assay with chicken erythrocytes. If the HA inhibition assay was negative a second passage was done. The HA subtype was further characterized with subtype-specific hyper-immune rabbit antisera and chicken erythrocytes. The NA subtype was characterized by RT-PCR and sequencing using primers specific for noncoding conserved regions [54,55]. The viral concentration of the stock solution used for inoculating the ducks was determined by 50% Embryo Infectious Dose (EID<sub>50</sub>) as previously described [28] to a titer of 10<sup>9.5</sup> EID<sub>50</sub>/mL. The NA

gene was sequenced (in the same way as experimental samples, see below) and deposited to Genbank with accession number JX912288. No known resistance mutations were found.

OC was obtained from the manufacturer F. Hoffmann - La Roche Ltd, Basel, Switzerland. ZA was purchased from the pharmacy as Relenza®. Both compounds were dissolved in double-distilled water to stock solutions and stored at -20°C.

### Experimental Mallard Model

The mallard model is previously described in [28]. In brief, male mallards (*Anas platyrhynchos*), aged 3 to 6 months, were purchased from a Swedish game farm. The ducks were kept in accordance with recommendations from the Swedish Agricultural Board after ethical approval by the Ethical Committee on Animal Experiments in Uppsala (permit C201/11). The uninfected birds were kept in a separate building to minimize the contamination risk. All birds were tested for present or previous influenza A infection by serology (Avian Influenza Virus Antibody test Kit, IDEXX Laboratories Europe, The Netherlands) and RRT-PCR of the influenza A matrix gene from fecal samples [56] before entering the study and the animal house facilities. Each experiment consisted of four generations of mallards, two individuals in each, that each spent 5 days in the experimental room. The first generation of mallards was inoculated by esophageal administration (day zero) of 1 mL viral stock solution, corresponding to 10<sup>9.5</sup> EID<sub>50</sub>, and put in the experimental room. In the room they had one sole water source (170L), for swimming and drinking that contained OC and access to feed *ad libitum*. Every third day the next two birds were introduced to the experimental room and spent two days with the previous ones to allow the virus to be fecal-orally transmitted. Each experiment thus lasted 14 days (Figure 1) during which the OC exposure was constant. The water was changed every day and OC was added to concentrations of 120 ng/L (0.42 nM), 1.2 µg/L (4.2 nM) or 12 µg/L (42 nM) in three different experiments.

### Sampling and Analysis

Fecal samples were collected from each individual every day. The birds were put in cardboard boxes from which fresh feces was sampled. If no defecation occurred in the box, cloacal swabbing was performed. The samples were analyzed with RRT-PCR and the NA gene was sequenced. Phenotypic resistance was tested in a neuraminidase inhibition assay. Necropsies and subsequent histopathologic evaluations were performed on two birds in each experiment 5 days pi; one artificially inoculated and one fecal-orally infected. Water samples were collected daily for viral detection and OC concentration analysis.

### Viral Detection and Sequencing of the NA and HA Genes

Viral RNA was isolated using the Magnatrix 8000 extraction robot (Magnetic Biosolutions, Stockholm, Sweden) and Vet Viral NA kit (NorDiag ASA, Oslo, Norway). A one step real-time reverse transcriptase (RRT) PCR targeting the matrix gene of influenza A virus [56] was used to evaluate viral shedding. Reactions of 25 µL were run in a Corbett Research Rotor-Gene 2000 Real-time Thermo Cycler (Corbett Research, Mortlake, Australia) each containing 1 µL RNA-extract, 12.5 µL iScript buffer 2x, 0.5 µL RT-enzyme, 1 µL forward primer, 1 µL reverse primer, 0.3 µL probe in a and 8.7 µL nuclease free H<sub>2</sub>O rendering final concentrations of 400 nM of each primer and 120 nM of probe. Four 10-fold dilution steps of cDNA were included in all RRT-PCR assays. The standard deviations of the CT-values of the cDNA samples ranged from 0.7 to 1.7. Given this

small variation, we chose to show RRT-PCR results as CT-values for simplicity.

Two forward and two reverse primers for amplification and sequencing of the NA-gene were designed and purchased from Thermo Hybaid, Interactiva Division (Ulm, Germany) (Table 2). Using these primers, a one-step reverse transcriptase PCR was performed on all samples positive in the RRT-PCR. The PCR had a reaction volume of 25 µL with 5 µL RNA, 12.5 µL reaction buffer, 1 µL H6N2-NA-FW1, 1 µL H6N2-NA-Rev1, 1 µL Superscript III Taq Platinum HiFi RT-enzyme and 4.5 µL nuclease free H<sub>2</sub>O rendering 500 nM final concentrations of primers. The PCR products were confirmed with gel electrophoresis and before sequencing they were purified with ExoSAP-IT (Affymetrix Inc, California, USA) using 2 µL ExoSAP-IT to 24 µL PCR-product. The PCR products were sent to Macrogen Inc. (South Korea or Europe) for sequencing (standard automated Sanger sequencing) of the NA gene using two forward (H6N2-NA-FW1 and H6N2-NA-FW2A) and two reverse (H6N2-NA-Rev1 and H6N2-NA-Rev2aB) primers (Table 2). The sequencing results were analyzed using SeqScape v2.7 software (Applied Biosystems), using the A/Mallard/Sweden/50908/2006(H6N2) NA sequence as a reference for detection of new mutations. N2 numbering was used for definition of amino acid residues.

Sequencing of the HA gene was performed on 8 selected samples, among which 6 were evaluable, from the 12 µg/L experiment that were NA sequenced as wild type, R292K, R292K and D113N, R292K and D141N prior to and after egg propagation. Two forward and two reversed primers were designed to amplify and sequence the HA gene in two segments (Table 3). QIAGEN One-Step RT-PCT Kit (QIAGEN) was used. The reaction volume was 25 µL with 5 µL template, 5 µL reaction buffer, 1 µL H6-HA-FW1 or H6-HA-FW2, 1 µL H6-HA-Rev1 or H6-HA-Rev2, 1 µL RT-enzyme, 1 µL RNA guard, 1 µL DNTPs and 10 µL nuclease free H<sub>2</sub>O rendering 500 nM final concentrations of primers. The PCR product was further confirmed by gel electrophoresis, purified, sequenced and analyzed similar to the NA gene analysis using the A/Mallard/Sweden/50908/2006(H6N2) HA sequence as a reference. H3 numbering was used for definition of amino acid residues.

### Neuraminidase Activity and Inhibition Assay

Viral samples were propagated by inoculation of the fecal sample or first passage isolate into the allantoic cavity of 11-days old embryonated eggs (2 eggs per sample) as described above (under *Virus and Drugs*). Successfully propagated samples were NA re-sequenced prior to the phenotypic resistance assay.

Neuraminidase activity was determined in 96 well plates using the fluorogenic substrate 29-(4-methylumbelliferyl)-a-D-N-acetylneuraminic acid (MUNANA; Sigma) as previously described [57,58]. The fluorescent product was detected in a GloMax®-Multi Microplate Multimode Reader (Promega) with excitation

**Table 2.** Primers Used to Amplify and Sequence the NA Gene of A/Mallard/Sweden/50908/2006(H6N2).

| Primer        | Sequence (5'-3')           | Location  |
|---------------|----------------------------|-----------|
| H6N2-NA-FW1   | TGAACCCAAATCAGAAGATAATAACA | 2-27      |
| H6N2-NA-Rev1  | GCGAAAGCTTATATAGGCATGAA    | 1395-1419 |
| H6N2-NA-FW2   | GTGTGCATAGCATGGTCCAG       | 520-540   |
| H6N2-NA-Rev2a | AACCTGAGCGTGAATCCTTG       | 1100-1120 |

doi:10.1371/journal.pone.0071230.t002

**Table 3.** Primers Used to Amplify and Sequence the HA Gene of A/Mallard/Sweden/50908/2006(H6N2).

| Primer     | Sequence (5'–3')               | Location  |
|------------|--------------------------------|-----------|
| H6-HA-FW1  | ATTGCAATCATTGTAATAGCGATACTGGC  | 21–49     |
| H6-HA-Rev1 | AGTCTGGCATGTGGCATCGCAGTTCTCG   | 884–911   |
| H6-HA-FW2  | TGAATGTGGAATCTAATGGAAATCTAATCG | 784–813   |
| H6-HA-Rev2 | TGCATTGCATTGAACCATTTGAACACATC  | 1676–1704 |

doi:10.1371/journal.pone.0071230.t003

and emission wavelengths of 365 and 460 nm respectively, measured as relative fluorescent units (RFU). Inhibition by OC and ZA was analyzed in the same MUNANA assay. Serially diluted OC and ZA (to assay concentrations 0.015 to 100,000 nM for OC and 0.015 to 4,000 nM for ZA) were added to duplicates of viral samples. The viral samples were diluted to concentrations corresponding to the log phase of the previously determined NA-activity. All R292K mutants showed relatively low NA activity and were diluted 1:2 while wild type virus samples were further diluted. Detection of NA inhibition was performed in the same way as the NA activity [57,58]. Analysis of NA activity and inhibition with determination of IC<sub>50</sub> was done using Prism5 GraphPad software (GraphPad).

### Statistical Analysis

Hypothesis testing of equality of IC<sub>50</sub> results and NA activity of mutant to wild type isolates was done with Mann-Whitney non-parametric U test, due to violation of the equal variance assumption of the OC results. 95% confidence intervals of the medians were calculated for each wild type and mutant groups. Statistical12 (StatSoft®) software was used to compute the hypothesis testing.

### Histopathology and Immunohistochemistry

All birds were euthanized with intravenous injection of 100 mg/kg sodium pentobarbital (Pentobarbital vet., 100 mg/ml). Necropsies were performed on 6 birds in total. Samples from inner organs and 10 levels of the GI tract were fixed in 10% neutral buffered formalin, routinely processed and stained for evaluation of histopathology and presence of intracellular virus by immunohistochemistry (IHC) staining with an anti-influenza A nucleoprotein (NP) monoclonal antibody (HB65, EVL, The Netherlands) [59] as described in detail in [29].

### References

- Patel A, Gorman SE (2009) Stockpiling antiviral drugs for the next influenza pandemic. *Clin Pharmacol Ther* 86: 241–243.
- Wan Po AL, Farndon P, Palmer N (2009) Maximizing the value of drug stockpiles for pandemic influenza. *Emerg Infect Dis* 15: 1686–1687.
- Moscona A (2009) Global transmission of oseltamivir-resistant influenza. *N Engl J Med* 360: 953–956.
- Bloom JD, Gong LI, Baltimore D (2010) Permissive secondary mutations enable the evolution of influenza oseltamivir resistance. *Science* 328: 1272–1275.
- Abed Y, Pizzorno A, Bouhy X, Boivin G (2011) Role of permissive neuraminidase mutations in influenza A/Brisbane/59/2007-like (H1N1) viruses. *PLoS Pathog* 7: e1002431.
- Olsen B, Munster VJ, Wallensten A, Waldenström J, Osterhaus AD, et al. (2006) Global patterns of influenza A virus in wild birds. *Science* 312: 384–388.
- Fields BN, Knipe DM, Howley PM (2007) *Fields' virology*. Philadelphia: Lippincott Williams & Wilkins.
- Cox NJ, Subbarao K (2000) Global epidemiology of influenza: past and present. *Annu Rev Med* 51: 407–421.
- Brockwell-Staats C, Webster RG, Webby RJ (2009) Diversity of influenza viruses in swine and the emergence of a novel human pandemic influenza A (H1N1). *Influenza Other Respi Viruses* 3: 207–213.

### Analysis of OC Concentration in the Water

Water samples were collected each day after 24 h exposure (when the water was changed). To estimate the loss of OC during the 24 h, water samples were also collected directly after addition of OC to the water. An on-line solid phase liquid extraction/liquid chromatography-tandem mass-spectrometry (SPE/LC-MS/MS) system was used to analyze the OC levels in the water samples. The SPE/LC-MS/MS system used has been described in detail previously in [28] with the exception that an extraction Oasis HLB column (2.1×20 mm, 15 µm particle size (Waters S.A.S., Saint-Quentin, En Yvelines Cedex, France)) was used in this system. Briefly, 10 mL sample (for the highest exposure level a sample/water volume of 1/10 was used) was pre-filtered (45 µm Filtropur) and acidified (0.1% of formic acid on volume basis) and thereafter 1 ml sample was analyzed using the SPE/LC-MS/MS system. Samples were quantified using internal standard method (deuterated OC obtained from Roche, F. Hoffmann-La Roche Ltd, Basel, Switzerland was used as internal standard) with six calibration points.

### NCBI Database Screening

The NA sequences of all avian influenza A/N2 viruses available in the NCBI Influenza Virus Sequence Database on April 19<sup>th</sup>, 2012 were aligned and analyzed regarding mutations at amino acid positions 292, 113 and 141 using the BioEdit v7.0.5.3 software.

### Acknowledgments

Susanne Bloemberg and all the other staff at the Animal House at the National Veterinary Institute (SVA) are gratefully acknowledged for excellent animal care and technical help. We thank Dr. Dolores Gavrier-Widén and Ewa Westerberg for essential assistance in histopathological analysis. We acknowledge the department of Molecular Diagnostics at the National Veterinary Institute, Uppsala, for their help with the RNA extraction. We thank the staff at Ottenby Bird Observatory for their skillful sampling of wild mallards, allowing us to obtain a virus isolate.

### Author Contributions

Conceived and designed the experiments: SM HS BO JDJ. Performed the experiments: AG SM HS JN CB RHL NLM JDJ. Analyzed the data: AG SM HS JN CB JDJ. Contributed reagents/materials/analysis tools: SM HS CB NLM JW BL JDJ. Wrote the paper: AG JDJ. Critically revised and actively contributed to the manuscript: SM HS JN CB RHL NLM JW BO.

- Guan Y, Vijaykrishna D, Bahl J, Zhu H, Wang J, et al. (2010) The emergence of pandemic influenza viruses. *Protein Cell* 1: 9–13.
- Fick J, Lindberg RH, Tysklind M, Haemig PD, Waldenström J, et al. (2007) Antiviral oseltamivir is not removed or degraded in normal sewage water treatment: implications for development of resistance by influenza A virus. *PLoS One* 2: e986.
- Söderstrom H, Järhult JD, Olsen B, Lindberg RH, Tanaka H, et al. (2009) Detection of the antiviral drug oseltamivir in aquatic environments. *PLoS One* 4: e6064.
- Leknes H, Sturtzel IE, Dye C (2012) Environmental release of oseltamivir from a Norwegian sewage treatment plant during the 2009 influenza A (H1N1) pandemic. *Sci Total Environ* 414: 632–638.
- Takanami R, Ozaki H, Giri RR, Taniguchi S, Hayashi S (2010) Detection of antiviral drugs oseltamivir phosphate and oseltamivir carboxylate in Neya River, Osaka Japan. *Journal of Water and Environment Technology* 2010: 363–372.
- Takanami R, Ozaki H, Giri RR, Taniguchi S, Hayashi S (2012) Antiviral Drugs Zanamivir and Oseltamivir Found in Wastewater and Surface Water in Osaka, Japan. *Journal of Water and Environment Technology* 2012: 57–68.



16. Prasse C, Schlusener MP, Schulz R, Ternes TA (2010) Antiviral drugs in wastewater and surface waters: a new pharmaceutical class of environmental relevance? *Environ Sci Technol* 44: 1728–1735.
17. Russell RJ, Haire LF, Stevens DJ, Collins PJ, Lin YP, et al. (2006) The structure of H5N1 avian influenza neuraminidase suggests new opportunities for drug design. *Nature* 443: 45–49.
18. Collins PJ, Haire LF, Lin YP, Liu J, Russell RJ, et al. (2008) Crystal structures of oseltamivir-resistant influenza virus neuraminidase mutants. *Nature* 453: 1258–1261.
19. Zurcher T, Yates PJ, Daly J, Sahasrabudhe A, Walters M, et al. (2006) Mutations conferring zanamivir resistance in human influenza virus N2 neuraminidases compromise virus fitness and are not stably maintained in vitro. *J Antimicrob Chemother* 58: 723–732.
20. Orozovic G, Orozovic K, Lemmerstrand J, Olsen B (2011) Detection of resistance mutations to antivirals oseltamivir and zanamivir in avian influenza A viruses isolated from wild birds. *PLoS One* 6: e16028.
21. Gamblin SJ, Skehel JJ (2010) Influenza hemagglutinin and neuraminidase membrane glycoproteins. *J Biol Chem* 285: 28403–28409.
22. Collins PJ, Haire LF, Lin YP, Liu J, Russell RJ, et al. (2009) Structural basis for oseltamivir resistance of influenza viruses. *Vaccine* 27: 6317–6323.
23. Eshaghi A, Bolotin S, Burton L, Low DE, Mazzulli T, et al. (2009) Genetic microheterogeneity of emerging H275Y influenza virus A (H1N1) in Toronto, Ontario, Canada from the 2007–2008 respiratory season. *J Clin Virol* 45: 142–145.
24. Zaraket H, Saito R, Suzuki Y, Baranovich T, Dapat C, et al. (2010) Genetic makeup of amantadine-resistant and oseltamivir-resistant human influenza A/H1N1 viruses. *J Clin Microbiol* 48: 1085–1092.
25. Yang JR, Lin YC, Huang YP, Su CH, Lo J, et al. (2011) Reassortment and mutations associated with emergence and spread of oseltamivir-resistant seasonal influenza A/H1N1 viruses in 2005–2009. *PLoS One* 6: e18177.
26. Cohen-Daniel L, Zakay-Rones Z, Resnick IB, Shapira MY, Dorozhko M, et al. (2009) Emergence of oseltamivir-resistant influenza A/H3N2 virus with altered hemagglutination pattern in a hematopoietic stem cell transplant recipient. *J Clin Virol* 44: 138–140.
27. McKimm-Breschkin JL, Sahasrabudhe A, Blick TJ, McDonald M, Colman PM, et al. (1998) Mutations in a conserved residue in the influenza virus neuraminidase active site decreases sensitivity to Neu5Ac2en-derived inhibitors. *J Virol* 72: 2456–2462.
28. Järhult JD, Muradrasoli S, Wahlgren J, Söderstrom H, Orozovic G, et al. Environmental levels of the antiviral oseltamivir induce development of resistance mutation H274Y in influenza A/H1N1 virus in mallards. *PLoS One* 6: e24742.
29. Bröjer C, Järhult JD, Muradrasoli S, Söderstrom H, Olsen B, et al. (2013) Pathobiology and virus shedding of low-pathogenic avian influenza virus (a/h1n1) infection in mallards exposed to oseltamivir. *J Wildl Dis* 49: 103–113.
30. WHO (2012) Meetings of the WHO working group on surveillance of influenza antiviral susceptibility - Geneva, November 2011 and June 2012. *Wkly Epidemiol Rec* 87: 369–374.
31. Bao Y, Bolotov P, Dernovoy D, Kiryutin B, Zaslavsky L, et al. (2008) The influenza virus resource at the National Center for Biotechnology Information. *J Virol* 82: 596–601.
32. Ferraris O, Lina B (2008) Mutations of neuraminidase implicated in neuraminidase inhibitors resistance. *J Clin Virol* 41: 13–19.
33. Tai CY, Escarpe PA, Sidwell RW, Williams MA, Lew W, et al. (1998) Characterization of human influenza virus variants selected in vitro in the presence of the neuraminidase inhibitor GS 4071. *Antimicrob Agents Chemother* 42: 3234–3241.
34. Gubareva LV, Robinson MJ, Bethell RC, Webster RG (1997) Catalytic and framework mutations in the neuraminidase active site of influenza viruses that are resistant to 4-guanidino-Neu5Ac2en. *J Virol* 71: 3385–3390.
35. Carr J, Ives J, Kelly L, Lambkin R, Oxford J, et al. (2002) Influenza virus carrying neuraminidase with reduced sensitivity to oseltamivir carboxylate has altered properties in vitro and is compromised for infectivity and replicative ability in vivo. *Antiviral Res* 54: 79–88.
36. Herlocher ML, Carr J, Ives J, Elias S, Truscott R, et al. (2002) Influenza virus carrying an R292K mutation in the neuraminidase gene is not transmitted in ferrets. *Antiviral Res* 54: 99–111.
37. Kiso M, Mitamura K, Sakai-Tagawa Y, Shiraiishi K, Kawakami C, et al. (2004) Resistant influenza A viruses in children treated with oseltamivir: descriptive study. *Lancet* 364: 759–765.
38. Varghese JN, Smith PW, Sollis SL, Blick TJ, Sahasrabudhe A, et al. (1998) Drug design against a shifting target: a structural basis for resistance to inhibitors in a variant of influenza virus neuraminidase. *Structure* 6: 735–746.
39. Yen HL, Herlocher LM, Hoffmann E, Matrosovich MN, Monto AS, et al. (2005) Neuraminidase inhibitor-resistant influenza viruses may differ substantially in fitness and transmissibility. *Antimicrob Agents Chemother* 49: 4075–4084.
40. Ha Y, Stevens DJ, Skehel JJ, Wiley DC (2001) X-ray structures of H5 avian and H9 swine influenza virus hemagglutinins bound to avian and human receptor analogs. *Proc Natl Acad Sci U S A* 98: 11181–11186.
41. Watanabe T, Shinya K, Watanabe S, Imai M, Hatta M, et al. (2011) Avian-type receptor-binding ability can increase influenza virus pathogenicity in macaques. *J Virol* 85: 13195–13203.
42. Hurt AC, Nor'e SS, McCaw JM, Fryer HR, Mosse J, et al. (2010) Assessing the viral fitness of oseltamivir-resistant influenza viruses in ferrets, using a competitive-mixtures model. *J Virol* 84: 9427–9438.
43. Stoner TD, Krauss S, DuBois RM, Negovetich NJ, Stallknecht DE, et al. (2010) Antiviral susceptibility of avian and swine influenza virus of the N1 neuraminidase subtype. *J Virol* 84: 9800–9809.
44. Russell CA, Fonville JM, Brown AE, Burke DF, Smith DL, et al. (2012) The potential for respiratory droplet-transmissible A/H5N1 influenza virus to evolve in a mammalian host. *Science* 336: 1541–1547.
45. Imai M, Watanabe T, Hatta M, Das SC, Ozawa M, et al. (2012) Experimental adaptation of an influenza H5 HA confers respiratory droplet transmission to a reassortant H5 HA/H1N1 virus in ferrets. *Nature* 486: 420–428.
46. Herfst S, Schrauwen EJ, Linster M, Chutinimitkul S, de Wit E, et al. (2012) Airborne transmission of influenza A/H5N1 virus between ferrets. *Science* 336: 1534–1541.
47. Ilyushina NA, Govorkova EA, Gray TE, Bovin NV, Webster RG (2008) Human-like receptor specificity does not affect the neuraminidase-inhibitor susceptibility of H5N1 influenza viruses. *PLoS Pathog* 4: e1000043.
48. Partridge J, Kieny MP (2010) Global production of seasonal and pandemic (H1N1) influenza vaccines in 2009–2010 and comparison with previous estimates and global action plan targets. *Vaccine* 28: 4709–4712.
49. Abelin A, Colegate T, Gardner S, Hehme N, Palache A (2011) Lessons from pandemic influenza A(H1N1): the research-based vaccine industry's perspective. *Vaccine* 29: 1135–1138.
50. Petersen E, Keld DB, Ellermann-Eriksen S, Gubbels S, Ilkjaer S, et al. (2011) Failure of combination oral oseltamivir and inhaled zanamivir antiviral treatment in ventilator- and ECMO-treated critically ill patients with pandemic influenza A (H1N1)v. *Scand J Infect Dis* 43: 495–503.
51. Doshi S, Kamimoto L, Finelli L, Perez A, Reingold A, et al. (2011) Description of antiviral treatment among adults hospitalized with influenza before and during the 2009 pandemic: United States, 2005–2009. *J Infect Dis* 204: 1848–1856.
52. Latorre-Margalef N, Gunnarsson G, Munster VJ, Fouchier RA, Osterhaus AD, et al. (2009) Effects of influenza A virus infection on migrating mallard ducks. *Proc Biol Sci* 276: 1029–1036.
53. WHO (2005) WHO manual on animal influenza diagnosis and surveillance. [www.who.int/csr/resources/publications/influenza/en/whodscsmcs20025rev.pdf](http://www.who.int/csr/resources/publications/influenza/en/whodscsmcs20025rev.pdf).
54. Hoffmann E, Stech J, Guan Y, Webster RG, Perez DR (2001) Universal primer set for the full-length amplification of all influenza A viruses. *Arch Virol* 146: 2275–2289.
55. Munster VJ, Baas C, Lexmond P, Waldenstrom J, Wallensten A, et al. (2007) Spatial, temporal, and species variation in prevalence of influenza A viruses in wild migratory birds. *PLoS Pathog* 3: e61.
56. Spackman E, Suarez DL (2008) Type A influenza virus detection and quantitation by real-time RT-PCR. *Methods Mol Biol* 436: 19–26.
57. Potier M, Mamei L, Belisle M, Dallaire L, Melancon SB (1979) Fluorometric assay of neuraminidase with a sodium (4-methylumbelliferyl-alpha-D-N-acetylneuraminic) substrate. *Anal Biochem* 94: 287–296.
58. Gubareva LV, Webster RG, Hayden FG (2002) Detection of influenza virus resistance to neuraminidase inhibitors by an enzyme inhibition assay. *Antiviral Res* 53: 47–61.
59. Bröjer C, Agren EO, Uhlhorn H, Bernodt K, Mörner T, et al. (2009) Pathology of natural highly pathogenic avian influenza H5N1 infection in wild tufted ducks (*Aythya fuligula*). *J Vet Diagn Invest* –587.
